# Supplementary material for: Planarian stem cells sense the identity of the missing pharynx to launch its targeted regeneration
Source: eLife. 2021 Jun 22;10:e68830. doi: 10.7554/eLife.68830 (PMC8219383; doi:10.7554/eLife.68830)
Supplement: Figure 1—figure supplement 1—source data 1. [file elife-68830-fig1-figsupp1-data1.xlsx]

## Sheet: Figure 1_S1C
# EdU⁺ ChAT⁺ cells per brain
	Exp 1			Exp 2
Experimental Group	animal 1	animal 2	animal 3	animal 4	animal 5	animal 6	AVERAGE	SD
0d EdU intact	54	119	83	14	40	30	56.6667	38.4586
0d EdU -phx	82	83	125	43	87	47	77.8333	30.0561
0d EdU -head	186	188	277	198	164	139	192	46.7033
0d EdU lat incision	80	95	96	133	67	95	94.3333	22.142
1d EdU intact	40	47	65	88	49	58	57.8333	17.1746
1d EdU -phx	64	83	105	65	72	49	73	19.2146
1d EdU -head	95	152	125	110	142	105	121.5	22.2239
1d EdU lat incision	79	41	81	53	129	97	80	31.4388
