# Supplementary material for: Planarian stem cells sense the identity of the missing pharynx to launch its targeted regeneration
Source: eLife. 2021 Jun 22;10:e68830. doi: 10.7554/eLife.68830 (PMC8219383; doi:10.7554/eLife.68830)
Supplement: Figure 1—source data 1. [file elife-68830-fig1-data1.xlsx]

## Sheet: Figure 1F
# EdU⁺ cells per pharynx
	Exp1			Exp2
Experimental Group	animal 1	animal 2	animal 3	animal 4	animal 5	animal 6	AVERAGE	SD
D0 EdU intact	84	119	136	166	129	43	112.833	43.2916
D0 EdU -phx	380	237	146	158	202	268	231.833	86.0196
D0 EdU -head	227	218	188	205	256	277	228.5	32.9044
D0 EdU lat incision	76	67	57	82	58	58	66.3333	10.6333
D1 EdU intact	115	96	150	94	87	63	100.833	29.3627
D1 EdU -phx	254	183	182	212	438	326	265.833	100.189
D1 EdU -head	169	143	110	167	117	118	137.333	26.2653
D1 EdU lat incision	40	84	102	130	97	77	88.3333	29.9377
