# Supplementary material for: Planarian stem cells sense the identity of the missing pharynx to launch its targeted regeneration
Source: eLife. 2021 Jun 22;10:e68830. doi: 10.7554/eLife.68830 (PMC8219383; doi:10.7554/eLife.68830)
Supplement: Figure 2—figure supplement 1—source data 1. [file elife-68830-fig2-figsupp1-data1.xlsx]

## Sheet: Figure 2_S1A
% FoxA⁺/piwi-1⁺ cells in prepharyngeal region
	Exp1						Exp2
	animal 1		animal 2		animal 3		animal 4		animal 5		animal 6		animal 7		animal 8
Experimental Group	progenitors	piwi-1⁺	progenitors	piwi-1⁺	progenitors	piwi-1⁺	progenitors	piwi-1⁺	progenitors	piwi-1⁺	progenitors	piwi-1⁺	progenitors	piwi-1⁺	progenitors	piwi-1⁺	%progenitor/piwi-1⁺	CI negative	CI positive
0dpa phx	10	82	16	98	9	81	10	67	16	71	9	78	11	51	11	103	14.58	2.55003	2.97997
1dpa phx	22	125	14	108	24	127	10	90	11	80	15	82	14	75	10	73	15.7895	2.42947	2.77053
2dpa phx	39	145	29	151	25	130	9	90	15	81	12	62	14	60	20	72	20.6068	2.67683	2.96317
3dpa phx	38	138	41	141	51	159	22	125	25	166	35	193	23	101	34	142	23.0901	2.33013	2.50987
4dpa phx	19	69	18	80	18	77	20	105	13	97	15	84	14	94	25	102	20.0565	2.7865	3.1135
5dpa phx	22	96	19	104	12	77	13	94	20	99	21	93	14	101	13	112	17.268	2.49804	2.82196

## Sheet: Figure2_S1B
% organ-specific progenitors/piwi-1⁺ cells in prepharyngeal region
	Exp1						Exp2								Exp3
	animal 1		animal 2		animal 3		animal 4		animal 5		animal 6		animal 7		animal 8		animal 9		animal 10
Experimental Group	progenitors	piwi-1⁺	progenitors	piwi-1⁺	progenitors	piwi-1⁺	progenitors	piwi-1⁺	progenitors	piwi-1⁺	progenitors	piwi-1⁺	progenitors	piwi-1⁺	progenitors	piwi-1⁺	progenitors	piwi-1⁺	progenitors	piwi-1⁺	%progenitor/piwi-1⁺	CI negative	CI positive
FoxA intact	12	132	9	85	3	124	10	109	5	130	7	118	7	117	12	86	10	81	6	64	7.74379	1.78621	1.47379
FoxA 3dpa phx	22	105	19	120	21	116	22	125	25	166	35	193	23	101	15	81	19	112	25	96	18.6008	2.28918	2.09082
FoxA 3dpa head	8	123	12	175	10	111	3	103	14	133	5	110	12	85	7	94	14	75	6	93	8.25771	1.78229	1.55771
ovo intact	1	93	1	59	1	107	1	116	1	70	1	87	3	66	1	62	0	50	0	80	1.26582	1.08418	0.605823
ovo 3dpa phx	2	115	1	108	1	110	2	82	0	141	1	89	1	103	1	75	1	98	1	80	1.0989	0.881099	0.508901
ovo 3dpa head	8	132	6	154	10	97	7	163	10	187	10	92	9	79	7	96	5	132	10	135	6.47198	1.23198	1.49802
myoD intact	1	96	3	122	4	84	5	95	4	109	4	103	3	50	4	70	5	92	4	92	4.05257	1.49743	1.11257
myoD 3dpa phx	2	148	5	118	5	99	4	141	3	108	4	100	5	82	2	85	3	86	7	89	3.78788	1.34212	1.00788
myoD 3dpa head	8	154	10	159	9	135	10	126	6	115	8	124	8	105	9	126	12	186	13	105	6.96629	1.49371	1.25629
six-1/2 intact	1	53	1	84	2	73	3	107	4	114	3	131	3	103	4	119	2	80	2	75	2.66241	1.25759	0.872407
six-1/2 3dpa phx	5	123	4	130	2	107	2	95	4	104	3	90	3	121	1	83	3	75	1	77	2.78607	1.22393	0.86607
six-1/2 3dpa head	19	177	10	143	10	149	10	150	8	140	14	95	8	101	10	115	8	102	6	148	7.80303	2.12697	1.71303
pax6a intact	4	130	4	143	3	142	4	85	5	104	4	123	6	109	3	108	1	82	3	76	3.35753	0.927532	1.25247
pax6a 3dpa phx	3	144	7	117	7	169	5	155	6	116	2	171	3	152	3	106	3	89	3	93	3.20122	0.83122	1.10878
pax6a 3dpa head	20	179	16	123	13	80	13	132	13	130	20	166	20	158	10	79	12	107	11	115	11.6627	1.65273	1.88727
gata-4/5/6 intact	9	53	14	65	8	61	11	109	13	108	5	63	11	106	12	123	9	131	6	117	10.4701	1.81009	2.12991
gata-4/5/6 3dpa phx	9	73	4	57	7	57	11	127	10	126	11	142	9	131	15	112	7	68	10	96	9.40344	1.67344	1.98656
gata-4/5/6 3dpa head	10	113	15	105	14	129	11	124	10	113	15	128	11	143	14	108	11	100	10	112	10.2979	1.61787	1.87213

## Sheet: Figure2_S1C
piwi-1⁺ cells also positive for the indicated progenitor marker in tail region
	Exp 1			Exp 2				Exp 3
Experimental Group	animal 1	animal 2	animal 3	animal 4	animal 5	animal 6	animal 7	animal 8	animal 9	animal 10	AVERAGE	SD
FoxA intact	2	2	4	1	3	5	2	3	3	3	2.8	1.13529
FoxA 3dpa phx	4	5	2	4	6	3	5	2	2	2	3.5	1.50923
FoxA 3dpa head	4	4	10	4	7	2	0	0	1	3	3.5	3.13581
ovo intact	0	0	0	0	0	0	0	0	0	0	0	0
ovo 3dpa phx	0	0	0	0	0	0	0	0	0	0	0	0
ovo 3dpa head	0	0	0	0	0	0	0	0	0	0	0	0
myoD intact	5	7	2	6	4	2	5	5	3	4	4.3	1.63639
myoD 3dpa phx	9	9	4	5	4	3	1	3	4	4	4.6	2.54733
myoD 3dpa head	6	4	1	1	7	6	2	4	3	1	3.5	2.27303
six-1/2 intact	5	3	2	5	2	5	8	1	3	6	4	2.16025
six-1/2 3dpa phx	2	2	4	2	7	4	4	7	2	3	3.7	1.94651
six-1/2 3dpa head	4	3	2	2	2	1	2	1	2	2	2.1	0.875595
pax6a intact	5	9	8	3	3	2	3	3	2	2	4	2.53859
pax6a 3dpa phx	4	7	7	2	6	4	2	2	4	3	4.1	1.96921
pax6a 3dpa head	8	9	6	1	2	5	0	1	3	3	3.8	3.08401
gata-4/5/6 intact	4	8	8	10	7	8	6	4	2	5	6.2	2.4404
gata-4/5/6 3dpa phx	9	6	7	14	6	6	6	2	6	2	6.4	3.40588
gata-4/5/6 3dpa head	4	3	10	4	7	6	12	5	5	4	6	2.90593
