# Supplementary material for: Planarian stem cells sense the identity of the missing pharynx to launch its targeted regeneration
Source: eLife. 2021 Jun 22;10:e68830. doi: 10.7554/eLife.68830 (PMC8219383; doi:10.7554/eLife.68830)
Supplement: Figure 2—figure supplement 3—source data 1. [file elife-68830-fig2-figsupp3-data1.xlsx]

## Sheet: Figure 2_S3A
Feeding assay 7dpa phx in RNAi animals
	Exp 1		Exp 2
Experimental Group	ate	total	ate	total	Combined % ate
control RNAi (unc22)	11	11	13	13	100
FoxA RNAi	0	11	0	11	0
ovo RNAi	11	11	11	11	100
myoD RNAi	11	11	11	11	100
six-1/2 RNAi	11	11	11	11	100
pax6a RNAi	11	11	9	9	100
gata-4/5/6 RNAi	14	14	11	11	100
coe RNAi	11	11	10	11	95.4545
