# Supplementary material for: Planarian stem cells sense the identity of the missing pharynx to launch its targeted regeneration
Source: eLife. 2021 Jun 22;10:e68830. doi: 10.7554/eLife.68830 (PMC8219383; doi:10.7554/eLife.68830)
Supplement: Figure 2—source data 1. [file elife-68830-fig2-data1.xlsx]

## Sheet: Figure 2B
FoxA⁺ piwi-1⁺ cells in prepharyngeal region
	Exp 1			Exp 2				Exp 3
Experimental Group	animal 1	animal 2	animal 3	animal 4	animal 5	animal 6	animal 7	animal 8	animal 9	animal 10	AVERAGE	SD
intact	12	9	3	10	5	7	7	12	10	6	8.1	2.99815
3dpa phx	22	19	21	22	25	35	23	15	19	25	22.6	5.2957
3dpa head	8	12	10	3	14	5	12	7	14	6	9.1	3.87155

## Sheet: Figure 2C
FoxA⁺ piwi-1⁺ cells in prepharyngeal region
	Exp 1			Exp 2
Experimental Group	animal 1	animal 2	animal 3	animal 4	animal 5	animal 6	animal 7	animal 8	AVERAGE	SD
0dpa phx	10	16	9	10	16	9	11	11	11.5	2.87849
1dpa phx	22	14	24	10	11	15	14	10	15	5.31843
2dpa phx	39	29	25	9	15	12	14	20	20.375	10.0845
3dpa phx	38	41	51	22	25	35	23	34	33.625	9.99911
4dpa phx	19	18	18	20	13	15	14	25	17.75	3.84522
5dpa phx	22	19	12	13	20	21	14	13	16.75	4.13176

## Sheet: Figure 2D
FoxA⁺ piwi-1⁺ cells in prepharyngeal region
	Exp 1					Exp 2
Experimental Group	animal 1	animal 2	animal 3	animal 4	animal 5	animal 6	animal 7	animal 8	animal 9	animal 10	AVERAGE	SD
intact	13	8	11	10	6	8	6	6	6	9	8.3	2.45176
3dpa phx incision	7	8	8	10	10	14	10	6	5	3	8.1	3.10734
3dpa phx partial	27	27	22	33	25	24	19	18	17	12	22.4	6.07728
3dpa flank ressection	12	15	8	7	11	23	14	19	12	9	13	4.98888

## Sheet: Figure 2E
piwi-1⁺ cells also positive for the indicated progenitor marker in prepharyngeal region
	Exp 1			Exp 2				Exp 3
Experimental Group	animal 1	animal 2	animal 3	animal 4	animal 5	animal 6	animal 7	animal 8	animal 9	animal 10	AVERAGE	SD
ovo intact	1	1	1	1	1	1	3	1	0	0	1	0.816497
ovo 3dpa phx	2	1	1	2	0	1	1	1	1	1	1.1	0.567646
ovo 3dpa head	8	6	10	7	10	10	9	7	5	10	8.2	1.8738
myoD intact	1	3	4	5	4	4	3	4	5	4	3.7	1.1595
myoD 3dpa phx	2	5	5	4	3	4	5	2	3	7	4	1.56347
myoD 3dpa head	8	10	9	10	6	8	8	9	12	13	9.3	2.05751
six-1/2 intact	1	1	2	3	4	3	3	4	2	2	2.5	1.08012
six-1/2 3dpa phx	5	4	2	2	4	3	3	1	3	1	2.8	1.31656
six-1/2 3dpa head	19	10	10	10	8	14	8	10	8	6	10.3	3.71334
pax6a intact	4	4	3	4	5	4	6	3	1	3	3.7	1.33749
pax6a 3dpa phx	3	7	7	5	6	2	3	3	3	3	4.2	1.8738
pax6a 3dpa head	20	16	13	13	13	20	20	10	12	11	14.8	3.9101
gata-4/5/6 intact	9	14	8	11	13	5	11	12	9	6	9.8	2.93636
gata-4/5/6 3dpa phx	9	4	7	11	10	11	9	15	7	10	9.3	2.94581
gata-4/5/6 3dpa head	10	15	14	11	10	15	11	14	11	10	12.1	2.13177
