# Supplementary material for: Planarian stem cells sense the identity of the missing pharynx to launch its targeted regeneration
Source: eLife. 2021 Jun 22;10:e68830. doi: 10.7554/eLife.68830 (PMC8219383; doi:10.7554/eLife.68830)
Supplement: Figure 3—figure supplement 1—source data 1. [file elife-68830-fig3-figsupp1-data1.xlsx]

## Sheet: Figure 3_S1A
% FoxA⁺/H3P⁺ cells in prepharyngeal region
	Exp1										Exp2
	animal 1		animal 2		animal 3		animal 4		animal 5		animal 6		animal 7		animal 8		animal 9		animal 10
Experimental Group	progenitors	H3P⁺	progenitors	H3P⁺	progenitors	H3P⁺	progenitors	H3P⁺	progenitors	H3P⁺	progenitors	H3P⁺	progenitors	H3P⁺	progenitors	H3P⁺	progenitors	H3P⁺	progenitors	H3P⁺	%progenitor/H3P⁺	CI negative	CI positive
0hpa phx	5	71	4	85	1	27	4	111	1	62	3	34	3	46	1	75	1	26	8	66	5.14096	1.52096	2.08904
0hpa head	3	67	6	57	2	57	4	48	2	48	5	52	5	45	2	57	2	27	3	57	6.60194	1.86194	2.05806
6hpa phx	11	80	15	109	7	99	8	87	8	75	9	96	16	94	10	85	13	88	8	95	11.5639	1.92388	2.24612
6hpa head	1	83	1	33	1	54	6	76	3	52	4	94	1	61	4	83	3	80	12	117	4.91132	1.36132	1.82868
12hpa phx	13	108	16	116	7	50	9	68	8	61	14	93	7	61	14	128	10	82	14	62	13.5103	2.17025	2.49975
12hpa head	1	76	5	71	3	88	3	72	6	110	6	119	3	129	2	91					3.83598	1.17598	1.63402
1dpa phx	18	88	10	79	16	74	10	77	14	65	15	126	18	141	17	111	11	174	17	159	13.3455	1.89552	2.14448
1dpa head	4	56	5	29	3	41	3	30	9	107	4	225	5	176	4	113	7	113	2	128	4.51866	1.12866	1.47134
2dpa phx	18	86	19	107	23	136	17	107	20	80	19	107	26	100	24	85	21	119	22	95	20.4501	2.3601	2.0899
2dpa head	5	166	2	91	5	127	4	97	8	109	1	109	14	116	11	151	8	112	7	139	5.341	1.141	1.419
3dpa phx	18	92	13	64	14	79	16	78	15	52	18	103	19	101	20	76	10	74	15	85	19.6517	2.60174	3.37826
3dpa head	5	104	9	152	4	98	3	42	4	57	4	60	2	109	3	51	10	114	2	71	5.36131	1.33131	1.72869
4dpa phx	2	41	4	39	6	61	8	59	8	51	13	126	19	115	20	97	10	98	11	95	12.9156	2.1756	2.5444
4dpa head	1	87	1	63	6	85	1	56	2	84	3	62	1	55	3	58	4	101	8	82	4.09277	1.23277	1.70723
5dpa phx	6	50	6	52	3	34	4	45	5	44	9	66	6	42	16	90	16	85	9	64	13.986	2.61601	3.09399
5dpa head	1	40	1	71	1	54	5	65	1	28	5	79	4	73	3	54	6	67	3	70	4.99168	1.49168	2.06832

## Sheet: Figure 3_S1C
% organ-specific progenitors/H3P⁺ cells in prepharyngeal region
	Exp1										Exp2
	animal 1		animal 2		animal 3		animal 4		animal 5		animal 6		animal 7		animal 8		animal 9		animal 10
Experimental Group	progenitors	H3P⁺	progenitors	H3P⁺	progenitors	H3P⁺	progenitors	H3P⁺	progenitors	H3P⁺	progenitors	H3P⁺	progenitors	H3P⁺	progenitors	H3P⁺	progenitors	H3P⁺	progenitors	H3P⁺	%progenitor/H3P⁺	CI negative	CI positive
myoD intact	2	24	1	24	2	74	1	52	0	39	3	66	4	66	1	72	2	41	3	93	3.44828	1.25828	1.91172
myoD 1dpa phx	2	102	2	83	1	74	1	88	2	107	2	107	3	93	4	125	1	102	3	116	2.10632	0.746319	1.11368
myoD 1dpa head	5	89	5	82	3	43	1	39	3	43	2	85	4	56	4	98	2	86	8	84	5.24823	1.43823	1.92177
myoD 2dpa phx	5	64	1	61	2	104	2	92	2	103	3	120	2	103	4	92	4	11	5	119	3.45224	1.04224	1.44776
myoD 2dpa head	7	127	4	107	6	107	10	109	6	115	8	121	7	137	11	119	10	161	10	30	6.97264	1.35264	1.63736
six-1/2 intact	3	40	1	61	1	20	4	44	3	55	2	49	2	55	2	56	1	61	2	52	4.25963	1.48963	2.20037
six-1/2 1dpa phx	3	87	4	146	3	96	4	112	3	105	11	154	10	164	8	128	6	100	3	112	4.56811	1.04811	1.34189
six-1/2 1dpa head	3	65	5	128	7	87	2	65	3	60	5	94	9	73	3	88	5	119	6	61	5.71429	1.39429	1.79571
six-1/2 2dpa phx	3	80	2	73	6	66	5	67	6	99	6	121	2	103	6	102	6	119	6	125	5.02618	1.22618	1.58382
six-1/2 2dpa head	8	111	7	113	7	81	3	20	8	121	5	160	4	146	4	131	4	142	6	154	4.74979	1.07979	1.38021
pax6a intact	2	43	0	50	2	66	3	50	2	70	2	63	1	69	1	97	0	85	1	88	2.0558	0.8558	1.3942
pax6a 1dpa phx	2	144	2	56	4	94	1	99	1	112	3	129	1	99	1	160	3	131	1	78	1.72414	0.634138	0.965862
pax6a 1dpa head	4	74	5	114	1	38	4	118	6	105	7	141	6	104	5	100	3	126	6	107	4.57644	1.12644	1.46356
pax6a 2dpa phx	1	76	2	65	3	51	2	68	1	104	2	160	0	97	1	81	1	138	3	114	1.67715	0.667149	1.05285
pax6a 2dpa head	1	34	3	54	2	68	2	36	2	105	15	177	5	105	6	102	8	139	5	107	5.28587	1.27587	2.25413
gata-4/5/6 intact	3	32	2	27	3	48	3	42	3	24	6	54	1	42	4	56	1	60	7	87	6.99153	2.13153	2.68847
gata-4/5/6 1dpa phx	1	48	4	118	7	72	5	96	2	92	4	69	5	84	3	99	10	121	8	115	5.36105	1.29105	1.66895
gata-4/5/6 1dpa head	4	73	2	48	2	80	3	51	2	55	5	65	5	99	3	67	5	87	3	59	4.97076	1.41076	1.90924
gata-4/5/6 2dpa phx	4	102	2	96	5	125	6	93	4	60	4	90	3	97	2	88	1	102	2	81	3.53319	1.02319	1.40681
gata-4/5/6 2dpa head	1	118	5	72	3	64	7	131	1	52	6	120	1	89	4	90	4	116	4	65	3.92585	1.09585	1.47415
