# Supplementary material for: Planarian stem cells sense the identity of the missing pharynx to launch its targeted regeneration
Source: eLife. 2021 Jun 22;10:e68830. doi: 10.7554/eLife.68830 (PMC8219383; doi:10.7554/eLife.68830)
Supplement: Figure 3—figure supplement 3—source data 1. [file elife-68830-fig3-figsupp3-data1.xlsx]

## Sheet: Figure 3_S3B
FoxA⁺ H3P⁺ cells in tail region
	Exp1															Exp 2
	animal 1			animal 2			animal 3			animal 4			animal 5			animal 6			animal 7			animal 8			animal 9			animal 10
Experimental Group	#cells	area (mm²)	#cells/mm²	#cells	area (mm²)	#cells/mm²	#cells	area (mm²)	#cells/mm²	#cells	area (mm²)	#cells/mm²	#cells	area (mm²)	#cells/mm²	#cells	area (mm²)	#cells/mm²	#cells	area (mm²)	#cells/mm²	#cells	area (mm²)	#cells/mm²	#cells	area (mm²)	#cells/mm²	#cells	area (mm²)	#cells/mm²	AVERAGE	SD
0hpa phx	0	0.182	0	1	0.226	4.42478	0	0.194	0	0	0.202	0	0	0.227	0	2	0.199	10.0503	0	0.205	0	0	0.166	0	0	0.227	0	1	0.205	4.87805	1.93531	3.44686
6hpa phx	0	0.222	0	2	0.255	7.84314	2	0.224	8.92857	1	0.223	4.4843	0	0.183	0	1	0.179	5.58659	2	0.164	12.1951	0	0.193	0	2	0.167	11.976	0	0.159	0	5.10138	4.99399
12hpa phx	2	0.106	18.8679	2	0.202	9.90099	1	0.178	5.61798	0	0.208	0	1	0.109	9.17431	1	0.179	5.58659	1	0.209	4.78469	0	9.214	0	0	0.2	0	1	0.207	4.83092	5.87634	5.79161
1dpa phx	0	0.205	0	1	0.2	5	0	0.195	0	1	0.213	4.69484	0	0.173	0	0	0.195	0	0	0.209	0	3	0.23	13.0435	3	0.216	13.8889	2	0.231	8.65801	4.52852	5.57735
2dpa phx	0	0.233	0	0	0.217	0	3	0.258	11.6279	2	0.243	8.23045	1	0.228	4.38596	0	0.212	0	1	0.214	4.6729	0	0.22	0	0	0.254	0	0	0.185	0	2.89172	4.22165
3dpa phx	0	0.237	0	0	0.21	0	1	0.249	4.01606	0	0.221	0	0	0.218	0	1	0.186	5.37634	3	0.168	17.8571	0	0.208	0	0	0.235	0	1	0.253	3.95257	3.12021	5.59937
4dpa phx	0	0.192	0	1	0.17	5.88235	0	0.21	0	0	0.232	0	2	0.161	12.4224	0	0.167	0	1	0.185	5.40541	0	0.226	0	0	0.173	0	0	0.213	0	2.37101	4.24157
5dpa phx	3	0.173	17.341	1	0.172	5.81395	0	0.121	0	1	0.166	6.0241	0	0.161	0	1	0.209	4.78469	0	0.23	0	0	0.17	0	0	0.217	0	0	0.187	0	3.39638	5.5612

## Sheet: Figure 3_S3C
FoxA⁺ H3P⁺ cells in tail region
	Exp1															Exp 2
	animal 1			animal 2			animal 3			animal 4			animal 5			animal 6			animal 7			animal 8			animal 9			animal 10
Experimental Group	#cells	area (mm²)	#cells/mm²	#cells	area (mm²)	#cells/mm²	#cells	area (mm²)	#cells/mm²	#cells	area (mm²)	#cells/mm²	#cells	area (mm²)	#cells/mm²	#cells	area (mm²)	#cells/mm²	#cells	area (mm²)	#cells/mm²	#cells	area (mm²)	#cells/mm²	#cells	area (mm²)	#cells/mm²	#cells	area (mm²)	#cells/mm²	AVERAGE	SD
0hpa head	1	0.153	6.53595	3	0.209	14.3541	0	0.227	0	0	0.201	0	0	0.183	0	0	0.209	0	0	0.222	0	0	0.216	0	0	0.222	0	0	0.235	0	2.089	4.77399
6hpa head	0	0.154	0	1	0.233	4.29185	0	0.273	0	0	0.205	0	0	0.272	0	0	0.203	0	0	0.202	0	0	0.21	0	1	0.247	4.04858	0	0.276	0	0.834043	1.75925
12hpa head	0	0.168	0	2	0.195	10.2564	1	0.218	4.58716	2	0.189	10.582	1	0.161	6.21118	1	0.216	4.62963	1	0.24	4.16667	0	0.216	0							5.05413	3.9863
1dpa head	1	0.224	4.46429	0	0.248	0	1	0.194	5.15464	1	0.234	4.2735	0	0.22	0	0	0.241	0	0	0.215	0	0	0.245	0	0	0.227	0	0	0.236	0	1.38924	2.24754
2dpa head	0	0.233	0	0	0.246	0	1	0.189	5.29101	0	0.235	0	0	0.222	0	0	0.251	0	0	0.182	0	1	0.177	5.64972	1	0.214	4.6729	0	0.202	0	1.56136	2.5248
3dpa head	0	0.243	0	0	0.208	0	2	0.246	8.13008	1	0.208	4.80769	1	0.221	4.52489	0	0.218	0	2	0.226	8.84956	1	0.177	5.64972	0	0.258	0	0	0.238	0	3.19619	3.61731
4dpa head	0	0.212	0	0	0.238	0	1	0.261	3.83142	0	0.238	0	0	0.24	0	0	0.21	0	0	0.242	0	0	0.205	0	0	0.242	0	1	0.195	5.12821	0.895962	1.91343
5dpa head	1	0.203	4.92611	2	0.241	8.29876	0	0.22	0	0	0.211	0	0	0.192	0	1	0.195	5.12821	0	0.214	0	0	0.212	0	0	0.189	0	0	0.261	0	1.83531	3.08673

## Sheet: Figure 3_S3D
H3P⁺ cells also postive for the indicated progenitor marker in tail region
	Exp1															Exp 2
	animal 1			animal 2			animal 3			animal 4			animal 5			animal 6			animal 7			animal 8			animal 9			animal 10
Experimental Group	#cells	area (mm²)	#cells/mm²	#cells	area (mm²)	#cells/mm²	#cells	area (mm²)	#cells/mm²	#cells	area (mm²)	#cells/mm²	#cells	area (mm²)	#cells/mm²	#cells	area (mm²)	#cells/mm²	#cells	area (mm²)	#cells/mm²	#cells	area (mm²)	#cells/mm²	#cells	area (mm²)	#cells/mm²	#cells	area (mm²)	#cells/mm²	AVERAGE	SD
myoD intact	2	0.226	8.84956	1	0.237	4.21941	2	0.232	8.62069	3	0.243	12.3457	0	0.203	0	1	0.228	4.38596	0	0.216	0	1	0.245	4.08163	1	0.2	5	1	0.242	4.13223	5.16352	3.86153
myoD 1dpa phx	0	0.165	0	1	0.189	5.29101	1	0.134	7.46269	2	0.188	10.6383	1	0.179	5.58659	0	0.16	0	0	0.242	0	0	0.206	0	2	0.208	9.61538	0	0.23	0	3.8594	4.36623
myoD 1dpa head	1	0.266	3.7594	1	0.234	4.2735	2	0.212	9.43396	1	0.188	5.31915	1	0.222	4.5045	0	0.262	0	0	0.246	0	2	0.224	8.92857	2	0.243	8.23045	0	0.241	0	4.44495	3.6494
myoD 2dpa phx	2	0.22	9.09091	1	0.192	5.20833	0	0.204	0	1	0.209	4.78469	1	0.16	6.25	2	0.253	7.90514	2	0.246	8.13008	1	0.231	4.329	2	0.16	12.5	2	0.208	9.61538	6.78135	3.46241
myoD 2dpa head	1	0.195	5.12821	2	0.21	9.52381	1	0.196	5.10204	3	0.24	12.5	1	0.184	5.43478	1	0.25	4	0	0.226	0	0	0.214	0	1	0.242	4.13223	1	0.233	4.29185	5.01129	3.78864
six-1/2 intact	2	0.254	7.87402	0	0.234	0	0	0.143	0	0	0.24	0	0	0.144	0	2	0.217	9.21659	0	0.244	0	0	0.195	0	0	0.277	0	0	0.184	0	1.70906	3.61689
six-1/2 1dpa phx	1	0.207	4.83092	0	0.216	0	3	0.184	16.3043	0	0.2	0	0	0.219	0	1	0.25	4	4	0.241	16.5975	1	0.26	3.84615	2	0.23	8.69565	0	0.239	0	5.42746	6.46771
six-1/2 1dpa head	0	0.158	0	0	0.248	0	0	0.233	0	0	0.193	0	0	0.183	0	1	0.211	4.73934	3	0.251	11.9522	0	0.266	0	0	0.19	0	0	0.246	0	1.66915	3.90805
six-1/2 2dpa phx	1	0.121	8.26446	2	0.163	12.2699	2	0.194	10.3093	2	0.205	9.7561	0	0.144	0	1	0.242	4.13223	1	0.206	4.85437	0	0.188	0	0	0.217	0	1	0.215	4.65116	5.42375	4.57551
six-1/2 2dpa head	2	0.26	7.69231	1	0.214	4.6729	3	0.261	11.4943	2	0.21	9.52381	0	0.239	0	0	0.214	0	0	0.232	0	1	0.238	4.20168	1	0.232	4.31034	1	0.22	4.54545	4.64407	4.01453
pax6a intact	0	0.192	0	1	0.208	4.80769	0	0.205	0	2	0.228	8.77193	1	0.189	5.29101	1	0.211	4.73934	2	0.239	8.3682	0	0.238	0	0	0.19	0	0	0.201	0	3.19782	3.62527
pax6a 1dpa phx	0	0.184	0	1	0.175	5.71429	1	0.187	5.34759	4	0.192	20.8333	0	0.199	0	1	0.226	4.42478	1	0.202	4.9505	2	0.227	8.81057	1	0.254	3.93701	0	0.202	0	5.40181	6.15264
pax6a 1dpa head	0	0.22	0	1	0.251	3.98406	0	0.253	0	1	0.253	3.95257	2	0.254	7.87402	0	0.268	0	1	0.243	4.11523	0	0.248	0	1	0.246	4.06504	2	0.252	7.93651	3.19274	3.12708
pax6a 2dpa phx	2	0.141	14.1844	1	0.143	6.99301	1	0.172	5.81395	0	0.141	0	1	0.185	5.40541	1	0.229	4.36681	0	0.199	0	2	0.226	8.84956	1	0.262	3.81679	0	0.19	0	4.94299	4.48131
pax6a 2dpa head	0	0.176	0	0	0.186	0	0	0.172	0	0	0.179	0	2	0.175	11.4286	1	0.281	3.55872	0	0.192	0	1	0.227	4.40529	3	0.204	14.7059	1	0.197	5.07614	3.91746	5.28361
gata-4/5/6 intact	1	0.186	5.37634	3	0.21	14.2857	2	0.165	12.1212	2	0.26	7.69231	2	0.176	11.3636	2	0.235	8.51064	2	0.188	10.6383	1	0.27	3.7037	4	0.233	17.1674	2	0.215	9.30233	10.0162	4.02153
gata-4/5/6 1dpa phx	1	0.228	4.38596	2	0.227	8.81057	2	0.197	10.1523	3	0.251	11.9522	3	0.219	13.6986	2	0.27	7.40741	4	0.268	14.9254	1	0.239	4.1841	5	0.245	20.4082	2	0.212	9.43396	10.5359	4.9557
gata-4/5/6 1dpa head	1	0.189	5.29101	3	0.235	12.766	1	0.244	4.09836	2	0.166	12.0482	4	0.232	17.2414	0	0.183	0	3	0.232	12.931	3	0.244	12.2951	0	0.179	0	3	0.26	11.5385	8.82095	5.99639
gata-4/5/6 2dpa phx	4	0.152	26.3158	0	0.197	0	4	0.157	25.4777	1	0.177	5.64972	2	0.178	11.236	3	0.232	12.931	3	0.218	13.7615	0	0.158	0	3	0.186	16.129	1	0.221	4.52489	11.6026	9.37382
gata-4/5/6 2dpa head	2	0.244	8.19672	6	0.16	37.5	2	0.25	8	2	0.227	8.81057	1	0.223	4.4843	0	0.251	0	2	0.187	10.6952	2	0.246	8.13008	6	0.189	31.746	2	0.243	8.23045	12.5793	12.0592
