# Supplementary material for: Planarian stem cells sense the identity of the missing pharynx to launch its targeted regeneration
Source: eLife. 2021 Jun 22;10:e68830. doi: 10.7554/eLife.68830 (PMC8219383; doi:10.7554/eLife.68830)
Supplement: Figure 3—source data 1. [file elife-68830-fig3-data1.xlsx]

## Sheet: Figure 3C
FoxA⁺ H3P⁺ cells in prepharyngeal region
	Exp1															Exp 2
	animal 1			animal 2			animal 3			animal 4			animal 5			animal 6			animal 7			animal 8			animal 9			animal 10
Experimental Group	#cells	area (mm²)	#cells/mm²	#cells	area (mm²)	#cells/mm²	#cells	area (mm²)	#cells/mm²	#cells	area (mm²)	#cells/mm²	#cells	area (mm²)	#cells/mm²	#cells	area (mm²)	#cells/mm²	#cells	area (mm²)	#cells/mm²	#cells	area (mm²)	#cells/mm²	#cells	area (mm²)	#cells/mm²	#cells	area (mm²)	#cells/mm²	AVERAGE	SD
0hpa phx	5	0.257	19.4553	4	0.271	14.7601	1	0.269	3.71747	4	0.213	18.7793	1	0.312	3.20513	3	0.289	10.3806	3	0.214	14.0187	1	0.287	3.48432	1	0.306	3.26797	8	0.3	26.6667	11.7736	8.33446
6hpa phx	11	0.265	41.5094	15	0.294	51.0204	7	0.238	29.4118	8	0.272	29.4118	8	0.278	28.777	9	0.286	31.4685	16	0.263	60.8365	10	0.278	35.9712	13	0.243	53.4979	8	0.285	28.0702	38.9975	12.0718
12hpa phx	13	0.314	41.4013	16	0.298	53.6913	7	0.303	23.1023	9	0.319	28.2132	8	0.31	25.8065	14	0.266	52.6316	7	0.314	22.293	14	0.291	48.11	10	0.297	33.67	14	0.299	46.8227	37.5742	12.3916
1dpa phx	18	0.321	56.0748	10	0.319	31.348	16	0.316	50.6329	10	0.321	31.1526	14	0.309	45.3074	15	0.266	56.391	18	0.314	57.3248	17	0.291	58.4192	11	0.297	37.037	17	0.299	56.8562	48.0544	11.0806
2dpa phx	18	0.316	56.962	19	0.304	62.5	23	0.315	73.0159	17	0.312	54.4872	20	0.319	62.6959	19	0.301	63.1229	26	0.303	85.8086	24	0.293	81.9113	21	0.299	70.2341	22	0.303	72.6073	68.3345	10.2607
3dpa phx	18	0.303	59.4059	13	0.273	47.619	14	0.28	50	16	0.305	52.459	15	0.299	50.1672	18	0.284	63.3803	19	0.239	79.4979	20	0.318	62.8931	10	0.289	34.6021	15	0.313	47.9233	54.7948	12.1432
4dpa phx	2	0.281	7.11744	4	0.311	12.8617	6	0.294	20.4082	8	0.318	25.1572	8	0.263	30.4183	13	0.275	47.2727	19	0.272	69.8529	20	0.281	71.1744	10	0.256	39.0625	11	0.28	39.2857	36.2611	21.8358
5dpa phx	6	0.289	20.7612	6	0.287	20.9059	3	0.295	10.1695	4	0.289	13.8408	5	0.211	23.6967	9	0.282	31.9149	6	0.292	20.5479	16	0.305	52.459	16	0.3	53.3333	9	0.303	29.703	27.7332	14.7299

## Sheet: Figure 3D
FoxA⁺ H3P⁺ cells in prepharyngeal region
	Exp1															Exp 2
	animal 1			animal 2			animal 3			animal 4			animal 5			animal 6			animal 7			animal 8			animal 9			animal 10
Experimental Group	#cells	area (mm²)	#cells/mm²	#cells	area (mm²)	#cells/mm²	#cells	area (mm²)	#cells/mm²	#cells	area (mm²)	#cells/mm²	#cells	area (mm²)	#cells/mm²	#cells	area (mm²)	#cells/mm²	#cells	area (mm²)	#cells/mm²	#cells	area (mm²)	#cells/mm²	#cells	area (mm²)	#cells/mm²	#cells	area (mm²)	#cells/mm²	AVERAGE	SD
0hpa head	3	0.212	14.1509	6	0.227	26.4317	2	0.248	8.06452	4	0.238	16.8067	2	0.205	9.7561	5	0.284	17.6056	5	0.259	19.305	2	0.261	7.66284	2	0.285	7.01754	3	0.307	9.77199	13.6573	6.34603
6hpa head	1	0.258	3.87597	1	0.278	3.59712	1	0.296	3.37838	6	0.257	23.3463	3	0.223	13.4529	4	0.281	14.2349	1	0.248	4.03226	4	0.25	16	3	0.303	9.90099	12	0.295	40.678	13.2497	11.726
12hpa head	1	0.3	3.33333	5	0.281	17.7936	3	0.278	10.7914	3	0.231	12.987	6	0.297	20.202	6	0.265	22.6415	3	0.295	10.1695	2	0.267	7.49064							13.1761	6.5927
1dpa head	4	0.273	14.652	5	0.268	18.6567	3	0.249	12.0482	3	0.284	10.5634	9	0.281	32.0285	4	0.302	13.245	5	0.309	16.1812	4	0.32	12.5	7	0.259	27.027	2	0.304	6.57895	16.3481	7.74577
2dpa head	5	0.258	19.3798	2	0.196	10.2041	5	0.242	20.6612	4	0.178	22.4719	8	0.214	37.3832	1	0.291	3.43643	14	0.252	55.5556	11	0.223	49.3274	8	0.254	31.4961	7	0.273	25.641	27.5557	16.3191
3dpa head	5	0.31	16.129	9	0.256	35.1562	4	0.258	15.5039	3	0.218	13.7615	4	0.242	16.5289	4	0.268	14.9254	2	0.288	6.94444	3	0.246	12.1951	10	0.273	36.63	2	0.285	7.01754	17.4792	9.28686
4dpa head	1	0.311	3.21543	1	0.296	3.37838	6	0.307	19.544	1	0.266	3.7594	2	0.278	7.19424	3	0.214	14.0187	1	0.314	3.18471	3	0.281	10.6762	4	0.289	13.8408	8	0.262	30.5344	10.9346	8.98964
5dpa head	1	0.249	4.01606	1	0.302	3.31126	1	0.261	3.83142	5	0.251	19.9203	1	0.228	4.38596	5	0.194	25.7732	4	0.23	17.3913	3	0.256	11.7188	6	0.224	26.7857	3	0.266	11.2782	12.8412	7.18114

## Sheet: Figure 3E
H3P⁺ cells also postive for the indicated progenitor marker in prepharyngeal region
	Exp1															Exp 2
	animal 1			animal 2			animal 3			animal 4			animal 5			animal 6			animal 7			animal 8			animal 9			animal 10
Experimental Group	#cells	area (mm²)	#cells/mm²	#cells	area (mm²)	#cells/mm²	#cells	area (mm²)	#cells/mm²	#cells	area (mm²)	#cells/mm²	#cells	area (mm²)	#cells/mm²	#cells	area (mm²)	#cells/mm²	#cells	area (mm²)	#cells/mm²	#cells	area (mm²)	#cells/mm²	#cells	area (mm²)	#cells/mm²	#cells	area (mm²)	#cells/mm²	AVERAGE	SD
myoD intact	2	0.313	6.38978	1	0.297	3.367	2	0.317	6.30915	1	0.316	3.16456	0	0.306	0	3	0.288	10.4167	4	0.282	14.1844	1	0.286	3.4965	2	0.275	7.27273	3	0.284	10.5634	6.51642	4.26557
myoD 1dpa phx	2	0.252	7.93651	2	0.316	6.32911	1	0.304	3.28947	1	0.299	3.34448	2	0.293	6.82594	2	0.321	6.23053	3	0.312	9.61538	4	0.292	13.6986	1	0.292	3.42466	3	0.305	9.83607	7.05308	3.35974
myoD 1dpa head	5	0.25	20	5	0.296	16.8919	3	0.279	10.7527	1	0.208	4.80769	3	0.269	11.1524	2	0.288	6.94444	4	0.289	13.8408	4	0.296	13.5135	2	0.276	7.24638	8	0.271	29.5203	13.467	7.31215
myoD 2dpa phx	5	0.308	16.2338	1	0.278	3.59712	2	0.307	6.51466	2	0.295	6.77966	2	0.29	6.89655	3	0.318	9.43396	2	0.32	6.25	4	0.32	12.5	4	0.281	14.2349	5	0.32	15.625	9.80656	4.49493
myoD 2dpa head	7	0.267	26.2172	4	0.254	15.748	6	0.213	28.169	10	0.256	39.0625	6	0.261	22.9885	8	0.289	27.6817	7	0.313	22.3642	11	0.295	37.2881	10	0.29	34.4828	10	0.298	33.557	28.7559	7.34951
six-1/2 intact	3	0.312	9.61538	1	0.277	3.61011	1	0.278	3.59712	4	0.282	14.1844	3	0.311	9.6463	2	0.284	7.04225	2	0.321	6.23053	2	0.283	7.06714	1	0.282	3.5461	2	0.298	6.71141	7.12507	3.3497
six-1/2 1dpa phx	3	0.25	12	4	0.308	12.987	3	0.228	13.1579	4	0.258	15.5039	3	0.315	9.52381	11	0.281	39.1459	10	0.297	33.67	8	0.311	25.7235	6	0.321	18.6916	3	0.321	9.34579	18.9749	10.4396
six-1/2 1dpa head	3	0.218	13.7615	5	0.273	18.315	7	0.261	26.8199	2	0.229	8.73362	3	0.229	13.1004	5	0.27	18.5185	9	0.258	34.8837	3	0.281	10.6762	5	0.264	18.9394	6	0.303	19.802	18.355	7.80003
six-1/2 2dpa phx	3	0.238	12.605	2	0.274	7.29927	6	0.241	24.8963	5	0.272	18.3824	6	0.294	20.4082	6	0.314	19.1083	2	0.301	6.64452	6	0.302	19.8675	6	0.309	19.4175	6	0.289	20.7612	16.939	6.04754
six-1/2 2dpa head	8	0.258	31.0078	7	0.226	30.9735	7	0.236	29.661	3	0.233	12.8755	8	0.245	32.6531	5	0.273	18.315	4	0.266	15.0376	4	0.264	15.1515	4	0.267	14.9813	6	0.287	20.9059	22.1562	8.00186
pax6a intact	2	0.306	6.53595	0	0.3	0	2	0.282	7.0922	3	0.27	11.1111	2	0.307	6.51466	2	0.296	6.75676	1	0.316	3.16456	1	0.293	3.41297	0	0.287	0	1	0.316	3.16456	4.77528	3.46753
pax6a 1dpa phx	2	0.287	6.96864	2	0.299	6.68896	4	0.266	15.0376	1	0.284	3.52113	1	0.292	3.42466	3	0.313	9.58466	1	0.308	3.24675	1	0.318	3.14465	3	0.315	9.52381	1	0.304	3.28947	6.44303	3.97566
pax6a 1dpa head	4	0.235	17.0213	5	0.266	18.797	1	0.215	4.65116	4	0.251	15.9363	6	0.242	24.7934	7	0.271	25.8303	6	0.298	20.1342	5	0.293	17.0648	3	0.283	10.6007	6	0.291	20.6186	17.5448	6.29347
pax6a 2dpa phx	1	0.292	3.42466	2	0.238	8.40336	3	0.267	11.236	2	0.255	7.84314	1	0.234	4.2735	2	0.268	7.46269	0	0.311	0	1	0.252	3.96825	1	0.285	3.50877	3	0.301	9.96678	6.00871	3.50254
pax6a 2dpa head	1	0.287	3.48432	3	0.243	12.3457	2	0.214	9.34579	2	0.264	7.57576	2	0.285	7.01754	15	0.265	56.6038	5	0.259	19.305	6	0.287	20.9059	8	0.28	28.5714	5	0.252	19.8413	18.4997	15.4916
gata-4/5/6 intact	3	0.301	9.96678	2	0.273	7.32601	3	0.299	10.0334	3	0.302	9.93377	3	0.32	9.375	6	0.28	21.4286	1	0.262	3.81679	4	0.306	13.0719	1	0.294	3.40136	7	0.307	22.8013	11.1155	6.5047
gata-4/5/6 1dpa phx	1	0.318	3.14465	4	0.287	13.9373	7	0.27	25.9259	5	0.314	15.9236	2	0.301	6.64452	4	0.319	12.5392	5	0.316	15.8228	3	0.315	9.52381	10	0.314	31.8471	8	0.307	26.0586	16.1367	9.19928
gata-4/5/6 1dpa head	4	0.231	17.316	2	0.265	7.54717	2	0.268	7.46269	3	0.274	10.9489	2	0.236	8.47458	5	0.262	19.084	5	0.26	19.2308	3	0.271	11.0701	5	0.25	20	3	0.291	10.3093	13.1443	5.15647
gata-4/5/6 2dpa phx	4	0.236	16.9492	2	0.316	6.32911	5	0.248	20.1613	6	0.299	20.0669	4	0.284	14.0845	4	0.318	12.5786	3	0.32	9.375	2	0.277	7.22022	1	0.28	3.57143	2	0.319	6.26959	11.6606	6.01367
gata-4/5/6 2dpa head	1	0.285	3.50877	5	0.21	23.8095	3	0.237	12.6582	7	0.301	23.2558	1	0.241	4.14938	6	0.283	21.2014	1	0.273	3.663	4	0.283	14.1343	4	0.281	14.2349	4	0.244	16.3934	13.7009	7.8487
