# Supplementary material for: Planarian stem cells sense the identity of the missing pharynx to launch its targeted regeneration
Source: eLife. 2021 Jun 22;10:e68830. doi: 10.7554/eLife.68830 (PMC8219383; doi:10.7554/eLife.68830)
Supplement: Figure 4—figure supplement 1—source data 1. [file elife-68830-fig4-figsupp1-data1.xlsx]

## Sheet: Figure 4_S1B
Feeding assay after nocodazole treatment
Experimental Group	DMSO	(same as Fig 4C)						Noc 0-1d							Noc 2-3d
	Exp1	Exp2	Exp3					Exp1	Exp2	Exp3					Exp1	Exp2	Exp3
dpa phx	# that ate	# that ate	# that ate	total animals	% ate	CI negative	CI positive	# that ate	# that ate	# that ate	total animals	% ate	CI negative	CI positive	# that ate	# that ate	# that ate	total animals	% ate	CI negative	CI positive
1	0	0	0	54	0	0	7.94	0	0	0	53	0	0	8.08	0	0	0	54	0	0	7.94
2	0	0	0	54	0	0	7.94	0	0	0	53	0	0	8.08	0	0	0	54	0	0	7.94
3	0	0	0	54	0	0	7.94	0	0	0	53	0	0	8.08	0	0	0	54	0	0	7.94
4	1	0	9	54	18.5185	8.32852	12.5115	0	0	0	53	0	0	8.08	0	0	0	54	0	0	7.94
5	24	15	14	54	98.1481	6.08815	1.84185	0	0	0	53	0	0	8.08	0	0	0	54	0	0	7.94
6	24	15	15	54	100	10.69	0	0	10	5	53	28.3019	10.4219	13.3481	8	3	3	54	25.9259	9.91593	13.1141
7								0	12	13	53	47.1698	12.7898	13.1702	22	15	14	54	94.4444	10.1444	4.23556
8								11	14	13	53	71.6981	13.3481	10.4219	22	15	14	54	94.4444	10.1444	4.23556
9								20	14	16	53	94.3396	10.3096	4.31038	23	15	14	54	96.2963	9.5563	3.4037
10								21	15	16	53	98.1132	8.99321	1.87679	23	15	14	54	96.2963	9.5563	3.4037
11								22	15	16	53	100	8.08	0	23	15	14	54	96.2963	9.5563	3.4037
12															23	15	14	54	96.2963	9.5563	3.4037
13															23	15	14	54	96.2963	9.5563	3.4037
14															23	15	14	54	96.2963	9.5563	3.4037
15															23	15	14	54	96.2963	9.5563	3.4037
16															23	15	14	54	96.2963	9.5563	3.4037
17															23	15	14	54	96.2963	9.5563	3.4037
18															23	15	14	54	96.2963	9.5563	3.4037
19															23	15	14	54	96.2963	9.5563	3.4037
20															23	15	14	54	96.2963	9.5563	3.4037
21															23	15	14	54	96.2963	9.5563	3.4037
22															23	15	15	54	98.1481	6.08815	1.84185
23															23	15	15	54	98.1481	6.08815	1.84185
24															23	15	15	54	98.1481	6.08815	1.84185
25															23	15	15	54	98.1481	6.08815	1.84185
26															24	15	15	54	100	10.69	0
