# Supplementary material for: Planarian stem cells sense the identity of the missing pharynx to launch its targeted regeneration
Source: eLife. 2021 Jun 22;10:e68830. doi: 10.7554/eLife.68830 (PMC8219383; doi:10.7554/eLife.68830)
Supplement: Figure 4—figure supplement 2—source data 1. [file elife-68830-fig4-figsupp2-data1.xlsx]

## Sheet: Figure 4_S2B
FoxA⁺ H3P⁺ cells in prepharyngeal region after nocodazole treatment
	Exp1															Exp 2
	animal 1			animal 2			animal 3			animal 4			animal 5			animal 6			animal 7			animal 8			animal 9			animal 10
Experimental Group	#cells	area (mm²)	#cells/mm²	#cells	area (mm²)	#cells/mm²	#cells	area (mm²)	#cells/mm²	#cells	area (mm²)	#cells/mm²	#cells	area (mm²)	#cells/mm²	#cells	area (mm²)	#cells/mm²	#cells	area (mm²)	#cells/mm²	#cells	area (mm²)	#cells/mm²	#cells	area (mm²)	#cells/mm²	#cells	area (mm²)	#cells/mm²	AVERAGE	SD
DMSO 2dpa phx	14	0.308	45.4545	14	0.255	54.902	9	0.259	34.749	12	0.252	47.619	18	0.25	72	17	0.258	65.8915	11	0.259	42.471	21	0.257	81.7121	15	0.263	57.0342	9	0.283	31.8021	53.3636	16.1567
1-2d Noc 2dpa phx	103	0.31	332.258	66	0.3	220	109	0.272	400.735	105	0.303	346.535	75	0.235	319.149	117	0.205	570.732	107	0.231	463.203	92	0.289	318.339	97	0.241	402.49	90	0.208	432.692	380.613	96.3293

## Sheet: Figure 4_S2D
FoxA⁺ piwi-1⁺ cells in prepharyngeal region after nocodazole treatement
	Exp 1				Exp 2
Experimental Group	animal 1	animal 2	animal 3	animal 4	animal 5	animal 6	animal 7	animal 8	AVERAGE	SD
DMSO intact	8	5	6	4	5	4	8	7	5.875	1.64208
1d Noc intact	5	7	4	5	6	5	6	7	5.625	1.06066

## Sheet: FIgure 4_S2E
FoxA⁺ piwi-1⁺ cells in prepharyngeal region after nocodazole treatment
	Exp 1			Exp 2				Exp 3
Experimental Group	animal 1	animal 2	animal 3	animal 4	animal 5	animal 6	animal 7	animal 8	animal 9	animal 10	AVERAGE	SD
DMSO 3dpa phx (same as Fig 4F)	19	23	31	26	20	18	28	20	22	24	23.1	4.20185
0-1d Noc 3dpa phx	13	14	15	11	10	8	6	7	12	10	10.6	2.98887
1-2d Noc 3dpa phx (same as Fig 4F)	8	7	4	7	6	2	2	4	2	5	4.7	2.26323
2-3d Noc 3dpa phx	9	24	14	18	17	14	20	17	14	13	16	4.16333
