# Supplementary material for: Planarian stem cells sense the identity of the missing pharynx to launch its targeted regeneration
Source: eLife. 2021 Jun 22;10:e68830. doi: 10.7554/eLife.68830 (PMC8219383; doi:10.7554/eLife.68830)
Supplement: Figure 4—source data 1. [file elife-68830-fig4-data1.xlsx]

## Sheet: Figure 4C
Feeding assay after nocodazole treatment
Experimental Group	DMSO							Noc 1-2d							Noc 0-2d
	Exp1	Exp2	Exp3					Exp1	Exp2	Exp3					Exp1	Exp2	Exp3
dpa phx	# that ate	# that ate	# that ate	total animals	% ate	CI negative	CI positive	# that ate	# that ate	# that ate	total animals	% ate	CI negative	CI positive	# that ate	# that ate	# that ate	total animals	% ate	CI negative	CI positive
1	0	0	0	54	0	0	7.94	0	0	0	63	0	0	6.88	0	0	0	70	0	0	6.23
2	0	0	0	54	0	0	7.94	0	0	0	63	0	0	6.88	0	0	0	70	0	0	6.23
3	0	0	0	54	0	0	7.94	0	0	0	63	0	0	6.88	0	0	0	70	0	0	6.23
4	1	0	9	54	18.5185	8.32852	12.5115	0	0	0	63	0	0	6.88	0	0	0	70	0	0	6.23
5	24	15	14	54	98.1481	6.08815	1.84185	0	0	0	63	0	0	6.88	0	0	0	70	0	0	6.23
6	24	15	15	54	100	10.69	0	1	0	0	63	1.5873	1.5773	7.6827	0	0	0	70	0	0	6.23
7								1	0	6	63	11.1111	5.92111	10.3889	0	0	0	70	0	0	6.23
8								1	0	6	63	11.1111	5.92111	10.3889	0	0	0	70	0	0	6.23
9								1	0	10	63	17.4603	7.60032	11.3397	0	0	0	70	0	0	6.23
10								1	1	12	63	22.2222	8.61222	11.8078	0	0	1	70	1.42857	1.41857	6.97143
11								1	1	13	63	23.8095	8.91952	11.9305	0	0	1	70	1.42857	1.41857	6.97143
12								1	1	13	63	23.8095	8.91952	11.9305	0	0	1	70	1.42857	1.41857	6.97143
13								1	1	13	63	23.8095	8.91952	11.9305	0	0	3	70	4.28571	3.30571	8.06429
14								1	1	13	63	23.8095	8.91952	11.9305	2	0	3	70	7.14286	4.42286	8.87714
15								1	1	13	63	23.8095	8.91952	11.9305	7	0	3	70	14.2857	6.53571	10.2543
16								1	1	13	63	23.8095	8.91952	11.9305	14	0	7	70	30	9.51	11.59
17								1	1	13	63	23.8095	8.91952	11.9305	14	0	10	70	34.2857	10.0657	11.7043
18								1	3	13	63	26.9841	9.47413	12.1259	14	0	12	70	37.1429	10.3929	11.7271
19								1	8	13	63	34.9206	10.6206	12.3594	16	5	15	70	51.4286	11.4786	11.3214
20								1	15	13	63	46.0317	11.7217	12.1783	20	9	16	70	64.2857	11.7257	10.2343
21								1	16	17	63	53.9683	12.1783	11.7217	20	16	23	70	84.2857	10.4457	6.88429
22								1	20	18	63	61.9048	12.3648	10.9952	22	16	24	70	88.5714	9.78143	5.76857
23								1	20	18	63	61.9048	12.3648	10.9952	22	17	24	70	90	9.51	5.35
24								2	21	19	63	66.6667	12.3367	10.4233	23	18	24	70	92.8571	8.87714	4.42286
25								6	21	20	63	74.6032	12.0332	9.20683	23	20	24	70	95.7143	8.06429	3.30571
26								8	21	22	63	80.9524	11.5124	7.95762	25	20	24	70	98.5714	6.97143	1.41857
27								10	21	22	63	84.127	11.137	7.21302	25	20	24	70	98.5714	6.97143	1.41857
28								12	21	22	63	87.3016	10.6716	6.37841	25	20	24	70	98.5714	6.97143	1.41857
29								13	21	22	63	88.8889	10.3889	5.92111	25	20	24	70	98.5714	6.97143	1.41857
30								16	21	22	63	93.6508	9.32079	4.29921	25	20	24	70	98.5714	6.97143	1.41857
31								17	21	22	63	95.2381	8.8581	3.6619	25	20	25	70	100	5.13	0
32								17	22	22	63	96.8254	7.8254	2.7846
33								17	22	22	63	96.8254	7.8254	2.7846
34								17	22	22	63	96.8254	7.8254	2.7846
35								18	22	22	63	98.4127	7.6827	1.5773
36								18	22	22	63	98.4127	7.6827	1.5773
37								19	22	22	63	100	6.88	0

## Sheet: Figure 4F
FoxA⁺ piwi-1⁺ cells in prepharyngeal region after nocodazole treatment
	Exp 1				Exp 2
Experimental Group	animal 1	animal 2	animal 3	animal 4	animal 5	animal 6	animal 7	animal 8	animal 9	animal 10	AVERAGE	SD
DMSO 3dpa phx	19	23	31	26	20	18	28	20	22	24	23.1	4.20185
1-2d Noc 3dpa phx	8	7	4	7	6	2	2	4	2	5	4.7	2.26323
