# Supplementary material for: Planarian stem cells sense the identity of the missing pharynx to launch its targeted regeneration
Source: eLife. 2021 Jun 22;10:e68830. doi: 10.7554/eLife.68830 (PMC8219383; doi:10.7554/eLife.68830)
Supplement: Figure 5—figure supplement 1—source data 1. [file elife-68830-fig5-figsupp1-data1.xlsx]

## Sheet: Figure 5_S1C
Feeding assay after UO treatment
Experimental Group	DMSO (same as Fig 5D)							0-5d UO							1-6d UO							2-7d UO
	Exp1	Exp2	Exp3					Exp1	Exp2	Exp3					Exp1	Exp2	Exp3					Exp1	Exp2	Exp3
dpa phx	# that ate	# that ate	# that ate	total animals	% ate	CI negative	CI positive	# that ate	# that ate	# that ate	total animals	% ate	CI negative	CI positive	# that ate	# that ate	# that ate	total animals	% ate	CI negative	CI positive	# that ate	# that ate	# that ate	total animals	% ate	CI negative	CI positive
1	0	0	0	49	0	0	8.68	0	0	0	48	0	0	8.85	0	0	0	45	0	0	9.38	0	0	0	47	0	0	8.85
2	0	0	0	49	0	0	8.68	0	0	0	48	0	0	8.85	0	0	0	45	0	0	9.38	0	0	0	47	0	0	8.85
3	0	0	0	49	0	0	8.68	0	0	0	48	0	0	8.85	0	0	0	45	0	0	9.38	0	0	0	47	0	0	8.85
4	0	0	0	49	0	0	8.68	0	0	0	48	0	0	8.85	0	0	0	45	0	0	9.38	0	0	0	47	0	0	8.85
5	8	13	15	49	73.4694	13.8394	10.4306	0	0	0	48	0	0	8.85	0	0	0	45	0	0	9.38	15	11	7	47	70.2128	14.2728	11.2172
6	8	17	16	49	83.6735	12.9735	8.07653	0	0	0	48	0	0	8.85	0	1	0	45	2.22222	2.21222	10.4078	15	16	12	47	91.4894	11.9494	5.68064
7	15	17	17	49	100	8.68	0	0	0	0	48	0	0	8.85	1	1	0	45	4.44444	4.03444	11.2056	15	16	13	47	93.617	11.427	4.83298
8								0	0	0	48	0	0	8.85	1	1	0	45	4.44444	4.03444	11.2056	15	16	13	47	93.617	11.427	4.83298
9								0	0	0	48	0	0	8.85	1	3	1	45	11.1111	6.72111	12.8389	15	16	14	47	95.7447	10.7847	3.87532
10								13	3	7	48	47.9167	13.4467	13.7533	3	5	1	45	20	15.61	3.95	15	16	14	47	95.7447	10.7847	3.87532
11								15	17	11	48	89.5833	12.1933	6.32667	7	7	8	45	48.8889	13.9289	14.1111	15	16	14	47	95.7447	10.7847	3.87532
12								15	17	16	48	100	8.85	0	12	7	10	45	64.4444	16.8444	10.4756	15	16	15	47	97.8723	10.0123	2.11766
13															14	13	14	45	91.1111	12.3911	5.91889	15	16	15	47	97.8723	10.0123	2.11766
14															14	13	14	45	91.1111	12.3911	5.91889	15	16	15	47	97.8723	10.0123	2.11766
15															14	14	14	45	93.3333	11.8533	5.03667	15	16	15	47	97.8723	10.0123	2.11766
16															14	14	14	45	93.3333	11.8533	5.03667	15	16	15	47	97.8723	10.0123	2.11766
17															15	14	14	45	95.5556	11.2556	4.03444	15	16	15	47	97.8723	10.0123	2.11766
18															15	14	14	45	95.5556	11.2556	4.03444	15	16	15	47	97.8723	10.0123	2.11766
19															15	14	14	45	95.5556	11.2556	4.03444	15	16	15	47	97.8723	10.0123	2.11766
20															16	15	14	45	100	15.21	0	15	16	16	47	100	9.02	0
