# Supplementary material for: Planarian stem cells sense the identity of the missing pharynx to launch its targeted regeneration
Source: eLife. 2021 Jun 22;10:e68830. doi: 10.7554/eLife.68830 (PMC8219383; doi:10.7554/eLife.68830)
Supplement: Figure 5—figure supplement 2—source data 1. [file elife-68830-fig5-figsupp2-data1.xlsx]

## Sheet: Figure 5_S2B
Feeding assay 7dpa phx in RNAi animals
	Exp 1		Exp 2
Experimental Group	ate	total	ate	total	Combined % ate
control RNAi (unc22)	10	10	11	11	100
FoxA RNAi	0	10	0	11	0
fst RNAi	10	10	11	11	100
