# Supplementary material for: Planarian stem cells sense the identity of the missing pharynx to launch its targeted regeneration
Source: eLife. 2021 Jun 22;10:e68830. doi: 10.7554/eLife.68830 (PMC8219383; doi:10.7554/eLife.68830)
Supplement: Figure 5—figure supplement 3—source data 1. [file elife-68830-fig5-figsupp3-data1.xlsx]

## Sheet: Figure 5_S3A
FoxA⁺ piwi-1⁺ cells in prepharyngeal region after PD & UO treatment
	Exp 1				Exp 2
Experimental Group	animal 1	animal 2	animal 3	animal 4	animal 5	animal 6	animal 7	animal 8	animal 9	animal 10	AVERAGE	SD
DMSO intact	6	6	11	9	5	6	9	4	9	5	7	2.3094
3d PD intact	10	15	13	7	7	9	8	9	7	6	9.1	2.88483
3d UO intact	6	11	8	10	11	5	6	9	6	4	7.6	2.54733

## Sheet: Figure 5_S3B
FoxA⁺ piwi-1⁺ cells in prepharyngeal region after UO treatment
	Exp 1				Exp 2
Experimental Group	animal 1	animal 2	animal 3	animal 4	animal 5	animal 6	animal 7	animal 8	animal 9	animal 10	AVERAGE	SD
DMSO 3dpa phx (same as Fig 4F & 5F)	19	23	31	26	20	18	28	20	22	24	23.1	4.20185
0-3d UO 3dpa phx	12	18	22	13	15	18	11	14	9	15	14.7	3.83116
0-1d UO 3dpa phx	20	23	22	27	31	18	22	16	21	21	22.1	4.28045
1-2d UO 3dpa phx	14	9	13	15	15	11	13	14	16	9	12.9	2.46982
2-3d UO 3dpa phx	20	26	21	24	30	22	10	20	22	23	21.8	5.13809

## Sheet: Figure 5_S3C
Feeding assay after PD treatment
Experimental Group	DMSO							0-5d PD							0-3d PD							1-2d PD							0-1d PD
	Exp1	Exp2	Exp3					Exp1	Exp2	Exp3					Exp1	Exp2	Exp3					Exp1	Exp2	Exp3					Exp1	Exp2	Exp3
dpa phx	# that ate	# that ate	# that ate	total animals	% ate	CI negative	CI positive	# that ate	# that ate	# that ate	total animals	% ate	CI negative	CI positive	# that ate	# that ate	# that ate	total animals	% ate	CI negative	CI positive	# that ate	# that ate	# that ate	total animals	% ate	CI negative	CI positive	# that ate	# that ate	# that ate	total animals	% ate	CI negative	CI positive
1	0	0	0	52	0	0	8.22	0	0	0	50	0	0	8.52	0	0	0	50	0	0	8.52	0	0	0	46	0	0	9.2	0	0	0	62	0	0	6.98
2	0	0	0	52	0	0	8.22	0	0	0	50	0	0	8.52	0	0	0	50	0	0	8.52	0	0	0	46	0	0	9.2	0	0	0	62	0	0	6.98
3	0	0	0	52	0	0	8.22	0	0	0	50	0	0	8.52	0	0	0	50	0	0	8.52	0	0	0	46	0	0	9.2	0	0	0	62	0	0	6.98
4	0	1	0	52	1.92308	1.91308	9.14692	0	0	0	50	0	0	8.52	0	0	0	50	0	0	8.52	0	0	0	46	0	0	9.2	0	0	0	62	0	0	6.98
5	23	12	8	52	82.6923	12.6523	8.15769	0	0	0	50	0	0	8.52	0	0	0	50	0	0	8.52	0	1	0	46	2.17391	2.16391	10.2061	3	0	0	62	4.83871	3.71871	8.99129
6	26	14	11	52	98.0769	9.14692	1.91308	0	0	0	50	0	0	8.52	0	0	0	50	0	0	8.52	0	3	10	46	28.2609	11.0409	14.3891	24	11	14	62	79.0323	11.8023	8.41774
7	26	15	11	52	100	8.22	0	0	0	0	50	0	0	8.52	0	0	0	50	0	0	8.52	5	8	15	46	60.8696	14.4396	12.7604	24	22	16	62	100	11.5	0
8								0	0	0	50	0	0	8.52	12	0	11	50	46	13.03	13.6	5	11	15	46	67.3913	14.4913	11.8087
9								3	0	1	50	8	5.36	11.35	22	1	12	50	70	13.83	10.97	5	14	15	46	73.913	14.303	10.617
10								8	0	1	50	18	9.42	13.44	22	9	12	50	86	12.5	7.36	9	15	15	46	84.7826	13.3226	7.95739
11								16	3	5	50	48	14.34	14.58	22	11	12	50	90	11.79	6.09	14	15	15	46	95.6522	10.9922	3.95783
12								19	6	6	50	62	13.88	12.16	22	13	12	50	94	10.84	4.566	14	16	15	46	97.8261	10.2061	2.16391
13								21	7	9	50	74	13.67	10.24	22	13	12	50	94	10.84	4.566	14	16	15	46	97.8261	10.2061	2.16391
14								22	9	10	50	82	13.02	8.46	22	13	12	50	94	10.84	4.566	14	16	15	46	97.8261	10.2061	2.16391
15								22	9	10	50	82	13.02	8.46	22	13	12	50	94	10.84	4.566	14	16	15	46	97.8261	10.2061	2.16391
16								22	11	10	50	86	12.5	7.36	23	14	12	50	98	9.47	1.99	14	16	15	46	97.8261	10.2061	2.16391
17								22	11	10	50	86	12.5	7.36	23	14	12	50	98	9.47	1.99	14	16	15	46	97.8261	10.2061	2.16391
18								22	11	10	50	86	12.5	7.36	23	14	12	50	98	9.47	1.99	14	17	15	46	100	9.2	0
19								23	12	10	50	90	11.79	6.09	23	15	12	50	100	8.52	0
20								23	12	11	50	92	6.22	5.36
21								23	12	12	50	94	10.84	3.36
22								23	13	12	50	96	12.84	1.36
23								23	13	12	50	96	12.84	1.36
24								23	14	12	50	98	9.47	1.99
25								23	14	12	50	98	9.47	1.99
26								23	14	12	50	98	9.47	1.99
27								23	14	12	50	98	9.47	1.99
28								23	14	12	50	98	9.47	1.99
29								23	14	12	50	98	9.47	1.99
30								23	15	12	50	100	8.52	0

## Sheet: Figure 5_S3D
FoxA⁺ H3P⁺ cells in prepharyngeal region after UO treatment
	Exp1															Exp 2
	animal 1			animal 2			animal 3			animal 4			animal 5			animal 6			animal 7			animal 8			animal 9			animal 10
Experimental Group (same as Fig 5H)	#cells	area (mm²)	#cells/mm²	#cells	area (mm²)	#cells/mm²	#cells	area (mm²)	#cells/mm²	#cells	area (mm²)	#cells/mm²	#cells	area (mm²)	#cells/mm²	#cells	area (mm²)	#cells/mm²	#cells	area (mm²)	#cells/mm²	#cells	area (mm²)	#cells/mm²	#cells	area (mm²)	#cells/mm²	#cells	area (mm²)	#cells/mm²	AVERAGE	SD
DMSO 2dpa phx	10	0.277	36.1011	18	0.27	66.6667	21	0.218	96.3303	10	0.265	37.7358	15	0.228	65.7895	10	0.225	44.4444	12	0.262	45.8015	13	0.261	49.8084	14	0.282	49.6454	14	0.21	66.6667	55.899	18.2441
1-2d UO 2dpa phx	12	0.212	56.6038	10	0.294	34.0136	10	0.207	48.3092	9	0.239	37.6569	11	0.275	40	17	0.249	68.2731	14	0.244	57.377	10	0.254	39.3701	10	0.234	42.735	18	0.279	64.5161	48.8855	12.0498

## Sheet: Figure 5_S3E
H3P⁺ cells in prepharyngeal region after PD & UO treatment
	Exp1															Exp 2
	animal 1			animal 2			animal 3			animal 4			animal 5			animal 6			animal 7			animal 8			animal 9			animal 10
Experimental Group (same as Fig 5H)	#cells	area (mm²)	#cells/mm²	#cells	area (mm²)	#cells/mm²	#cells	area (mm²)	#cells/mm²	#cells	area (mm²)	#cells/mm²	#cells	area (mm²)	#cells/mm²	#cells	area (mm²)	#cells/mm²	#cells	area (mm²)	#cells/mm²	#cells	area (mm²)	#cells/mm²	#cells	area (mm²)	#cells/mm²	#cells	area (mm²)	#cells/mm²	AVERAGE	SD
DMSO 2dpa phx	65	0.277	234.657	126	0.27	466.667	107	0.218	490.826	95	0.265	358.491	74	0.228	324.561	78	0.225	346.667	74	0.262	282.443	88	0.261	337.165	91	0.282	322.695	62	0.21	295.238	345.941	78.73
1-2d PD 2dpa phx	62	0.204	303.922	71	0.24	295.833	55	0.246	223.577	44	0.193	227.979	56	0.203	275.862	55	0.263	209.125	59	0.252	234.127	69	0.233	296.137	48	0.229	209.607	41	0.3	136.667	241.284	52.3108
1-2d UO 2dpa phx	59	0.212	278.302	79	0.294	268.707	65	0.207	314.01	60	0.239	251.046	45	0.275	163.636	53	0.249	212.851	58	0.244	237.705	41	0.254	161.417	84	0.234	358.974	47	0.279	168.459	241.511	66.5747
