# Supplementary material for: Planarian stem cells sense the identity of the missing pharynx to launch its targeted regeneration
Source: eLife. 2021 Jun 22;10:e68830. doi: 10.7554/eLife.68830 (PMC8219383; doi:10.7554/eLife.68830)
Supplement: Figure 5—source data 2. [file elife-68830-fig5-data2.xlsx]

## Sheet: Figure 5C
Feeding assay after PD treatment
Experimental Group	DMSO							0-5d PD							1-6d PD							2-7d PD
	Exp1	Exp2	Exp3					Exp1	Exp2	Exp3					Exp1	Exp2	Exp3					Exp1	Exp2	Exp3
dpa phx	# that ate	# that ate	# that ate	total animals	% ate	CI negative	CI positive	# that ate	# that ate	# that ate	total animals	% ate	CI negative	CI positive	# that ate	# that ate	# that ate	total animals	% ate	CI negative	CI positive	# that ate	# that ate	# that ate	total animals	% ate	CI negative	CI positive
1	0	0	0	49	0	0	8.68	0	0	0	47	0	0	9.02	0	0	0	47	0	0	9.02	0	0	0	48	0	0	8.85
2	0	0	0	49	0	0	8.68	0	0	0	47	0	0	9.02	0	0	0	47	0	0	9.02	0	0	0	48	0	0	8.85
3	0	0	0	49	0	0	8.68	0	0	0	47	0	0	9.02	0	0	0	47	0	0	9.02	0	0	0	48	0	0	8.85
4	0	0	0	49	0	0	8.68	0	0	0	47	0	0	9.02	0	0	0	47	0	0	9.02	0	0	0	48	0	0	8.85
5	8	13	15	49	73.4694	13.8394	10.4306	0	0	0	47	0	0	9.02	0	0	0	47	0	0	9.02	13	10	14	48	77.0833	13.7833	9.76667
6	8	17	16	49	83.6735	12.9735	8.07653	0	0	0	47	0	0	9.02	2	1	0	47	6.38298	4.83298	11.427	13	16	16	48	93.75	11.22	4.74
7	15	17	17	49	100	8.68	0	0	0	0	47	0	0	9.02	2	1	0	47	6.38298	4.83298	11.427	15	16	16	48	97.9167	9.82667	2.07333
8								0	0	0	47	0	0	9.02	2	1	0	47	6.38298	4.83298	11.427	15	16	16	48	97.9167	9.82667	2.07333
9								0	0	0	47	0	0	9.02	3	3	0	47	12.766	7.15596	12.784	15	16	16	48	97.9167	9.82667	2.07333
10								5	0	0	47	10.6383	6.4483	12.4017	3	4	0	47	14.8936	7.80362	13.1064	15	16	16	48	97.9167	9.82667	2.07333
11								12	5	3	47	42.5532	13.0532	14.1768	4	6	1	47	23.4043	9.95426	13.9757	15	16	16	48	97.9167	9.82667	2.07333
12								13	5	7	47	53.1915	13.9615	13.4785	4	6	1	47	23.4043	9.95426	13.9757	15	16	16	48	97.9167	9.82667	2.07333
13								15	10	13	47	80.8511	13.6211	8.95894	5	6	1	47	25.5319	10.4119	14.1081	15	16	16	48	97.9167	9.82667	2.07333
14								15	12	14	47	87.234	12.784	7.15596	6	10	4	47	42.5532	13.0532	14.1768	15	16	16	48	97.9167	9.82667	2.07333
15								15	14	15	47	93.617	11.427	4.83298	8	10	6	47	51.0638	13.8238	13.6562	15	16	16	48	97.9167	9.82667	2.07333
16								15	14	15	47	93.617	11.427	4.83298	10	11	10	47	65.9574	14.3374	11.9226	15	16	16	48	97.9167	9.82667	2.07333
17								15	14	15	47	93.617	11.427	4.83298	11	12	12	47	74.4681	14.1081	10.4119	15	16	16	48	97.9167	9.82667	2.07333
18								15	14	15	47	93.617	11.427	4.83298	12	15	15	47	89.3617	12.4017	6.4483	15	17	16	48	100	8.85	0
19								15	14	15	47	93.617	11.427	4.83298	12	15	15	47	89.3617	12.4017	6.4483
20								16	14	15	47	95.7447	10.7847	3.87532	12	15	15	47	89.3617	12.4017	6.4483
21								16	15	15	47	97.8723	10.0123	2.11766	12	15	17	47	93.617	11.427	4.83298
22								16	16	15	47	100	9.02	0	13	15	17	47	95.7447	10.7847	3.87532
23															13	16	17	47	97.8723	10.0123	2.11766
24															13	16	17	47	97.8723	10.0123	2.11766
25															13	16	17	47	97.8723	10.0123	2.11766
26															14	16	17	47	100	9.02	0

## Sheet: FIgure 5F
FoxA⁺ piwi-1⁺ cells in prepharyngeal region after PD treatment
	Exp 1				Exp 2
Experimental Group	animal 1	animal 2	animal 3	animal 4	animal 5	animal 6	animal 7	animal 8	animal 9	animal 10	AVERAGE	SD
DMSO 3dpa phx (same as Fig 4F)	19	23	31	26	20	18	28	20	22	24	23.1	4.20185
0-3d PD 3dpa phx	18	17	17	14	10	6	9	15	13	11	13	3.94405
0-1d PD 3dpa phx	28	20	22	26	15	17	19	18	18	17	20	4.16333
1-2d PD 3dpa phx	20	17	23	13	19	11	17	15	8	8	15.1	5.06513
2-3d PD 3dpa phx	20	22	22	24	21	15	24	16	16	20	20	3.29983

## Sheet: Figure 5H
FoxA⁺ H3P⁺ cells in prepharyngeal region after PD treatment
	Exp1															Exp 2
	animal 1			animal 2			animal 3			animal 4			animal 5			animal 6			animal 7			animal 8			animal 9			animal 10
Experimental Group	#cells	area (mm²)	#cells/mm²	#cells	area (mm²)	#cells/mm²	#cells	area (mm²)	#cells/mm²	#cells	area (mm²)	#cells/mm²	#cells	area (mm²)	#cells/mm²	#cells	area (mm²)	#cells/mm²	#cells	area (mm²)	#cells/mm²	#cells	area (mm²)	#cells/mm²	#cells	area (mm²)	#cells/mm²	#cells	area (mm²)	#cells/mm²	AVERAGE	SD
DMSO 2dpa phx	10	0.277	36.1011	18	0.27	66.6667	21	0.218	96.3303	10	0.265	37.7358	15	0.228	65.7895	10	0.225	44.4444	12	0.262	45.8015	13	0.261	49.8084	14	0.282	49.6454	14	0.21	66.6667	55.899	18.2441
1-2d PD 2dpa phx	8	0.204	39.2157	12	0.24	50	12	0.246	48.7805	7	0.193	36.2694	9	0.203	44.335	11	0.263	41.8251	20	0.252	79.3651	15	0.233	64.3777	12	0.229	52.4017	8	0.3	26.6667	48.3237	14.8936
