# Supplementary material for: Planarian stem cells sense the identity of the missing pharynx to launch its targeted regeneration
Source: eLife. 2021 Jun 22;10:e68830. doi: 10.7554/eLife.68830 (PMC8219383; doi:10.7554/eLife.68830)
Supplement: Figure 6—source data 1. [file elife-68830-fig6-data1.xlsx]

## Sheet: Figure 6C
Eye regeneration (ovo⁺/opsin⁺) 7dpa eye resection
	Exp 1		Exp 2		Exp 3
Experimental Group	eyes regenerated	total	eyes regenerated	total	eyes regenerated	total	% regenerated	CI negative	CI positive
DMSO 7dpa eye	38	38	30	30	24	24	100	4.81	0
0-2d Noc 7dpa eye	26	26	24	24	50	50	100	4.44	0
0-5d PD 7dpa eye	18	18	22	22	28	28	100	6.4	0
0-5d UO 7dpa eye	23	24	25	26	22	22	97.2222	7.37222	2.58778

## Sheet: Figure 6E
Eye regeneration (ovo⁺/opsin⁺) 7dpa head amputation
	Exp 1		Exp 2		Exp 3
Experimental Group	eyes regenerated	total	eyes regenerated	total	eyes regenerated	total	% regenerated	CI negative	CI positive
DMSO 7dpa head	28	28	26	26	26	26	100	5.49	0
0-2d Noc 7dpa head	0	22	0	14	6	28	9.375	5.345	9.945
0-5d PD 7dpa head	0	28	0	28	0	28	0	0	5.24
0-5d UO 7dpa head	7	30	0	28	3	28	11.6279	6.63791	12.1421
