# Supplementary material for: Planarian stem cells sense the identity of the missing pharynx to launch its targeted regeneration
Source: eLife. 2021 Jun 22;10:e68830. doi: 10.7554/eLife.68830 (PMC8219383; doi:10.7554/eLife.68830)
Supplement: Supplementary file 1. [file elife-68830-supp1.xlsx]

## Sheet: Sheet1
Gene	Smed ID	Forward primer	Reverse primer	Vector
piwi-1	dd_Smed_v6_659_0_1	gaccaagaagaggaggtctcc	gcgttcgcgaattctgtcatt	T4P
FoxA	dd_Smed_v6_10718_0_4	aacgacctcaacggaatgttt	catgcgccaaagttaaggata	T4P
ovo	dd_Smed_v6_48430_0_1	aatgcccacagatttgtc	cataaagtgaattcgggtg	pCAmagic
myoD	dd_Smed_v6_12634_0_1	ctattccggtccatactcagc	actcttgatcaactttcctcg	T4P
gata-4/5/6	dd_Smed_v6_4075_0_1	gtccgtaagatccacgatccg	tgattgaggaatagggcttcg	T4P
six-1/2	dd_Smed_v6_9774_0_1	ccttgtcagggatctaatcc	ggtgaggatgataagttggg	pjc53.2
pax6a	dd_Smed_v6_17726_0_1	ctgggcataaatcaaaccgc	cttgggggataaactgatcc	pjc53.2
coe	dd_Smed_v6_9893_0_1	cgaagagcagacaacagcac	ttttaccaacacccgattgc	T4P
laminin	dd_Smed_v6_8356_0_1	agtcgctggcaaagtgcatct	aatgatgcgtggtatccacag	T4P
fst	dd_Smed_v6_9584_0_1	cagtggtgtgcaatttagcgagttc	gcaggtattcttggtttcgtaattcg	pjc53.2
ChAT	dd_Smed_v6_6208_0_1	tcggttgctgaaggtattgca	ggcatatagcattctacacgg	T4P
